1               **The influence of acute dietary nitrate supplementation on skeletal muscle fatigue**  
2                                   **and recovery in older women**

3               **Running Title:** Nitrate and muscle fatigue and recovery in older women

4               William S. Zoughaib,<sup>1</sup> Richard L. Hoffman,<sup>1</sup> Brandon A. Yates,<sup>2</sup> Ranjani N. Moorthi,<sup>3</sup>  
5                                   Kenneth Lim,<sup>3</sup> and Andrew R. Coggan<sup>1,2</sup>

6           1. Department of Kinesiology, School of Health & Human Sciences, Indiana University Purdue  
7           University Indianapolis, Indianapolis, IN

8           2. Indiana Center for Musculoskeletal Health, Indiana University School of Medicine, Indianapolis  
9           IN

10          3. Division of Nephrology and Hypertension, Department of Medicine, Indiana University School of  
11          Medicine, Indianapolis IN

12      **Corresponding Author:** Andrew R. Coggan, PhD, Department of Kinesiology, Indiana University Purdue  
13      University Indianapolis, IF 101C, 250 University Boulevard, Indianapolis, IN 46112; Phone: (317) 274-  
14      0656; Fax: (317) 274-2041; e-mail: [acoggan@iupui.edu](mailto:acoggan@iupui.edu)

15 **ABSTRACT**

16 Older individuals fatigue more rapidly during, and recover more slowly from, dynamic exercise. Women  
17 are particularly vulnerable to these deleterious effects of aging, which increases their risk of falling. We  
18 have shown that dietary nitrate ( $\text{NO}_3^-$ ), a source of nitric oxide (NO) via the  $\text{NO}_3^- \rightarrow$  nitrite ( $\text{NO}_2^-$ )  $\rightarrow$  NO  
19 pathway, enhances muscle speed and power in older individuals in the non-fatigued state; however, it is  
20 unclear if it reduces fatigability and/or improves recoverability in this population. Using a double-blind,  
21 placebo-controlled, crossover design, we studied 18 older (age  $70 \pm 4$  y) women who were administered  
22 an acute dose of beetroot juice (BRJ) containing either  $15.6 \pm 3.6$  or  $<0.05$  mmol of  $\text{NO}_3^-$ . Blood samples  
23 were drawn throughout each  $\sim 3$  h visit for plasma  $\text{NO}_3^-$  and  $\text{NO}_2^-$  analysis. Peak torque was measured  
24 during, and periodically for 10 min after, 50 maximal knee extensions performed at 3.14 rad/s on an  
25 isokinetic dynamometer. Ingestion of  $\text{NO}_3^-$ -containing BRJ increased plasma  $\text{NO}_3^-$  and  $\text{NO}_2^-$  concentrations  
26 by  $21 \pm 8$  and  $4 \pm 4$  fold, respectively. However, there were no differences in muscle fatigue or recovery.  
27 Dietary  $\text{NO}_3^-$  increases plasma  $\text{NO}_3^-$  and  $\text{NO}_2^-$  concentrations but does not reduce fatigability during or  
28 enhance recoverability after high intensity exercise in older women.

29 **KEYWORDS**

30 nitric oxide, beetroot juice, isokinetic dynamometry, aging

31

## 32 INTRODUCTION

33 As humans age, there are detrimental changes in physical function, which are due in large part to changes  
34 in the properties of skeletal muscle. These include decreases in the maximal force, speed, and power of  
35 muscle contraction [Larsson et al. 2019], as well as reductions in mitochondrial respiratory capacity [Ferri  
36 et al. 2020] and in blood flow during exercise [Ridout et al. 2010; Casey et al. 2015]. The latter lead to a  
37 greater disturbance of cellular energetics during activity [Coggan et al. 1993; Lewsey et al. 2020], which  
38 along with the overall slowing of contractile properties result in increased fatigability during dynamic  
39 exercise [Christie et al. 2012], especially at higher movement velocities [Dalton et al. 2010; Callahan and  
40 Kent-Braun 2011]. The rate of recovery from fatiguing exercise, i.e., recoverability, is also diminished in  
41 older individuals [Schwendner et al. 1997; Yoon et al. 2012]. Since most activities of daily living are  
42 intermittent, not continuous, in nature, the latter may be of particular practical and clinical relevance.  
43 Women are especially susceptible to the deleterious effects of aging on physical function [Murtaugh and  
44 Hubert 2004; Freedman et al. 2016], with increased fatigability and reduced recoverability of muscle  
45 predisposing them to falls [Schwendner et al. 1997] and an increased risk hospitalization and even  
46 institutionalization.

47 Dietary nitrate ( $\text{NO}_3^-$ ) supplementation may provide a viable means of offsetting some of these  
48 detrimental age-related changes in skeletal muscle function. Upon ingestion and concentration/secretion  
49 by the salivary glands,  $\text{NO}_3^-$  can be reduced by oral bacteria to form nitrite ( $\text{NO}_2^-$ ), which once absorbed  
50 can in turn be reduced by, e.g., deoxyhemoglobin to generate nitric oxide (NO) [Lundberg and Weitzberg  
51 2009]. Given the importance of NO in modulating muscle function, including contractility, mitochondrial  
52 respiration, blood flow, etc. [Stamler and Meissner 2001], numerous studies in recent years have  
53 therefore assessed the effects of dietary  $\text{NO}_3^-$  (usually in the form of beetroot juice (BRJ)) on exercise  
54 capacity. As reviewed elsewhere, such studies have demonstrated that acute or short-term dietary  $\text{NO}_3^-$   
55 supplementation can improve the inherent contractile properties of muscle (Coggan et al. 2021; Esen et

56 al. 2022] as well as enhance performance during high intensity dynamic exercise [Silva et al. 2022], at  
57 least/especially during open-ended tests performed by non-athletes. Increasing NO bioavailability via  $\text{NO}_3^-$   
58 intake could therefore potentially ameliorate at least some of the negative effects of aging described  
59 above. Indeed, we recently found that acute ingestion of BRJ containing 13.4 mmol of  $\text{NO}_3^-$  significantly  
60 increased maximal knee extensor speed and power in twelve 71 y old men and women [Coggan et al.  
61 2020a]. However, there were no changes in fatigability during an “all-out”, 50 contraction (~1 min) fatigue  
62 test conducted at 3.14 rad/s on an isokinetic dynamometer. The latter finding could be due to the  
63 numerous factors likely contributing to muscle fatigue under such conditions (e.g., changes in high energy  
64 phosphate and/or  $\text{H}^+$  concentrations, altered  $\text{Ca}^{2+}$  handling kinetics, impaired excitation-contraction  
65 coupling, etc. [Kent-Braun et al. 2012]), only some of which might be influenced by increased NO  
66 bioavailability. However, they could also be due to the relatively small sample size, or to the fact that we  
67 studied older men as well as women when we have found that women appear to be more likely to benefit  
68 from  $\text{NO}_3^-$  supplementation [Coggan et al. 2018b].

69         Although dietary  $\text{NO}_3^-$  may not (or may) enhance muscle fatigue resistance in older persons, it  
70 might still improve the rate of recovery from fatiguing activities. As a potent vasodilator, NO could  
71 increase muscle blood flow post-exercise, when intramuscular pressure is no longer elevated by  
72 contractions. This might speed the “washout” of fatigue-related metabolites such as  $\text{H}^+$  from muscle  
73 [Kemp et al. 1997]. Furthermore, by delivering more  $\text{O}_2$ , higher post-exercise blood flow could increase  
74 the rate of mitochondrial ATP synthesis, thus resulting in more rapid restoration of high energy phosphate  
75 levels [Layec et al. 2013] and hence muscle function [Jansson et al. 1990]. In fact, two studies of healthy  
76 young men and women found that under hypoxic conditions dietary  $\text{NO}_3^-$  accelerated phosphocreatine  
77 (PCr) recovery kinetics following high intensity knee extensor exercise [Vanhatalo et al. 2011, 2014],  
78 indicative of increased  $\text{O}_2$  delivery via enhanced blood flow and/or improved mitochondrial coupling.  
79 However,  $\text{NO}_3^-$  ingestion had no effect on PCr recovery in healthy older men and women studied under

80 normoxic conditions [Kelly et al. 2013]. Thus, whether dietary  $\text{NO}_3^-$  supplementation might augment  
81 recovery of muscle function following fatiguing exercise in older persons is unclear.

82 The purpose of the present study was to test the hypothesis that acute dietary  $\text{NO}_3^-$   
83 supplementation would reduce fatigability and/or improve recoverability of muscle specifically in older  
84 women. If so, this could have broad implications for this population of individuals, who are particularly  
85 vulnerable to the deleterious effects of reductions in muscle function with aging.

## 86 **MATERIALS AND METHODS**

### 87 **Participants**

88 A total of 18 community-dwelling women with a mean age, height, weight, and body mass index of  $70 \pm 4$  y,  
89  $1.65 \pm 0.06$  m,  $67.1 \pm 9.5$  kg, and  $24.6 \pm 3.2$   $\text{kg/m}^2$ , respectively, completed this registered clinical trial  
90 (NCT03595774). These women were studied after screening a total of 143 potential participants, of whom  
91  $n=98$  were deemed ineligible based on a phone screen and review of their medical records,  $n=19$  declined  
92 to participate or were lost to follow-up, and  $n=8$  failed to meet inclusion criteria based on an initial visit  
93 to the University Hospital Clinical Research Center (CRC). During this visit, potential participants  
94 underwent a health history, physical examination, resting ECG, and phlebotomy (CBC, CMP, fasting insulin,  
95 and lipids), and also practiced the isokinetic dynamometry testing protocol (see below).

96 Individuals were excluded if they were not between the ages of 65 and 79 y, were unable to  
97 provide informed consent, were currently smokers, pregnant, or lactating, were taking proton pump  
98 inhibitors, antacids, or xanthine oxidoreductase inhibitors, or had a history of major metabolic (thyroid  
99 disorders, type I or II diabetes), cardiovascular (e.g., moderate or severe valvular disease,  
100 myocardial/pericardial disease, stage II or greater hypertension, heart failure, myocardial  
101 infarction/ischemia), renal (eGFR  $<60$   $\text{mL/min/1.73 m}^2$ , or  $61-90$   $\text{mL/min/1.73 m}^2$  and albumin:creatinine  
102 ratio  $> 30$ ), neuromuscular (e.g., cervical spondylotic radiculomyelopathy, lumbar spondylosis,  
103 amyotrophic lateral sclerosis, Guillain-Barre syndrome, acquired demyelinating polyneuropathies), or

104 liver (e.g., SGOT/SGPT >2x normal) diseases, were anemic (hematocrit < 30%), or had any other  
105 contraindications to vigorous exercise. Other exclusion criteria included whether the participant was on  
106 hormone replacement therapy or used phosphodiesterase inhibitors, since these can respectively  
107 diminish [Obach et al. 2004] or potentiate [Webb et al. 1999] the effects of dietary NO<sub>3</sub><sup>-</sup>. All other  
108 participants were included. The Human Subjects Office at Indiana University approved this study and  
109 written informed consent was obtained from each individual.

### 110 **Experimental Design and Protocol**

111 Starting approximately 1 wk after completion of the initial screening visit, eligible participants were  
112 studied using a randomized, double-blind, placebo-controlled crossover design. Participants were asked  
113 to avoid foods high in NO<sub>3</sub><sup>-</sup> (e.g., spinach, arugula, beets) for 24 h and alcohol, caffeine, or food for 12 h  
114 before testing. Otherwise, no dietary restrictions were imposed. Upon arrival at the CRC, an intravenous  
115 catheter was placed and a baseline blood sample taken for future analysis of plasma NO<sub>3</sub><sup>-</sup> and NO<sub>2</sub><sup>-</sup>  
116 concentrations as described below. The participant then ingested 140 mL of a concentrated beetroot juice  
117 (BRJ) supplement (Beet it Sport, James White Drinks, Ipswich, UK) containing (based on direct  
118 measurement) either 15.6±3.6 or <0.05 mmol of NO<sub>3</sub><sup>-</sup>. Extraction of NO<sub>3</sub><sup>-</sup> from BRJ to create the latter  
119 placebo was performed by the manufacturer using a highly selective anion exchange resin. After 1 and 2 h  
120 of quiet rest, additional blood samples were collected, after which muscle function testing was performed  
121 as described below. Ten minutes later, a final blood sample was obtained, after which participants were  
122 fed lunch then released. They then returned to the CRC after a 1 wk washout period and repeated the  
123 experiment, this time ingesting the opposite BRJ supplement than before. Participants therefore made a  
124 total of three study visits, i.e., initial screening, placebo BRJ, NO<sub>3</sub><sup>-</sup>-containing BRJ, with the latter two in  
125 random order.

## 126 **Measurement of Muscle Function**

127 Fatigability and recoverability of the knee extensor muscles were assessed using isokinetic dynamometry  
128 (Biodex System 4 Pro, Biodex Medical Systems, Shirley, NY). The femoral condyle of the participant's  
129 dominant leg was aligned with the dynamometer's axis of rotation while the lower leg, thigh, waist, and  
130 torso were securely restrained with straps to prevent any extraneous movement. The participant first  
131 performed three maximal knee extensions at each of five velocities (i.e., 0, 1.57, 3.14, 4.71, and 6.28  
132 rad/s), with 120 s of rest between sets, to determine their peak torque-velocity relationship (data  
133 reported separately). After an additional 120 s of rest, they then performed 50 maximal knee extensions  
134 at a velocity of 3.14 rad/s. The velocity of knee flexion was set to 6.28 rad/s, allowing the participant to  
135 freely reposition their leg against minimal resistance between repetitions. Participants were instructed to  
136 go "all-out" during this fatigue test, i.e., to extend their leg as quickly and as forcefully as possible during  
137 each repetition and to not pace themselves in an attempt to maintain torque. Strong verbal  
138 encouragement was provided throughout each test. After completion of the fatigue test, participants  
139 performed sets of three additional maximal knee extensions at 3.14 rad/s after 30, 60, 150, 300, and 600 s  
140 (nominally) of recovery.

141 Data from the isokinetic dynamometer were processed by windowing, filtering, and smoothing as  
142 previously described [Coggan et al. 2015]. Fatigability was assessed based on the average torque, total  
143 work, work during the first and last 1/3<sup>rd</sup> of the fatigue test, and the ratio of the latter as reported by the  
144 manufacturer's software. The torque data were also exported and analyzed to determine the peak torque  
145 during each of the 50 contractions. Recoverability was assessed based on the degree of restoration of  
146 peak torque at the different time points following the fatigue test. Because it was not possible to measure  
147 peak torque at identical times in every participant, a monoexponential function was also fit to the peak  
148 torque-recovery duration data (including the final value from the fatigue test) for each individual to  
149 determine their time constant ( $\tau$ ) and half-life ( $=\ln(2)/\tau$ ) of torque recovery:



$$\begin{aligned} 150 & \quad \quad \quad \text{Actual torque } (t) \\ 151 & \quad \quad \quad = \text{Minimum torque}_{\text{predicted}} \\ 152 & \quad \quad \quad + (\text{Maximum torque}_{\text{predicted}} - \text{Minimum torque}_{\text{predicted}}) \times (1 - e^{(-\tau \times t)}) \end{aligned}$$

153 where t = the exact time after the 50 contraction fatigue test and torque is expressed as a percentage of  
154 the maximum torque observed at the start of the fatigue test (which almost always occurred during the  
155 2<sup>nd</sup> or 3<sup>rd</sup> of the 50 knee extensions).

### 156 **Measurement of Plasma NO<sub>3</sub><sup>-</sup> and NO<sub>2</sub><sup>-</sup>**

157 A dedicated high-performance liquid chromatography system (ENO-30, Eicom USA, San Diego, CA) was  
158 used to measure plasma NO<sub>3</sub><sup>-</sup> and NO<sub>2</sub><sup>-</sup> concentrations as previously described in detail [Coggan et al.  
159 2018a]. Briefly, 25  $\mu$ L of thawed plasma was mixed 1:1 with methanol, centrifuged, and then a 10  $\mu$ L  
160 aliquot of the protein-poor supernatant was injected into the HPLC. Plasma NO<sub>3</sub><sup>-</sup> and NO<sub>2</sub><sup>-</sup> concentrations  
161 were determined from calibration curves generated using NIST-traceable standard solutions.

### 162 **Statistical Analysis**

163 Data were analyzed using GraphPad Prism version 9.3.1 (GraphPad Software, La Jolla, CA). The normality  
164 of data distribution was tested using the D'Agostino-Pearson omnibus test. Plasma NO<sub>3</sub><sup>-</sup> and NO<sub>2</sub><sup>-</sup> and  
165 peak torque data were compared between trials using two-way (treatment x time or treatment x  
166 contraction number) repeated measures ANOVA. Post-hoc testing was performed using the Holm-Šidák  
167 multiple comparison procedure. Fatigue test summary statistics (e.g., average torque) and  
168 monoexponential recovery curve fit parameters were compared between trials using paired t-tests.  
169 Multiplicity-corrected P values less than 0.05 were considered significant. Deidentified data are available  
170 from the authors upon request.

171 **RESULTS**

172 **Plasma NO<sub>3</sub><sup>-</sup> and NO<sub>2</sub><sup>-</sup> levels**

173 There were no significant changes in plasma NO<sub>3</sub><sup>-</sup> or NO<sub>2</sub><sup>-</sup> levels following ingestion of the NO<sub>3</sub><sup>-</sup>-depleted  
174 BRJ placebo (Table 1). In contrast, plasma NO<sub>3</sub><sup>-</sup> and NO<sub>2</sub><sup>-</sup> concentrations were significantly elevated 1 and  
175 2 h post-ingestion of NO<sub>3</sub><sup>-</sup>-containing BRJ, as well as 10 min after completion of the exercise testing  
176 (approximately 2.5 h post-ingestion).

177 **Fatigability**

178 There were no significant differences between placebo and NO<sub>3</sub><sup>-</sup> trials in the time required to complete  
179 the 50 contraction fatigue test (i.e., 62±6 vs. 64±9 s; P=0.153) or in the total time spent extending (33±2  
180 vs. 34±2 s; P=0.078) or flexing (29±4 vs. 30±7 s; P=0.384) the leg. There were also no significant differences  
181 between trials in the average torque, total work, work during the first 1/3<sup>rd</sup> or last 1/3<sup>rd</sup> of the test, or  
182 their ratio (Table 2). Finally, analysis of the raw data to determine the peak torque during each of the 50  
183 contractions also revealed no significant treatment (P=0.851) or interaction (P=0.963) effects (Fig. 1).

184 **Recoverability**

185 Peak torque was measured after 35±3, 64±5, 159±19, 309±20, and 603±4 s of recovery in the placebo trial  
186 and after 34±3, 65±2, 154±3, 302±4, and 603±7 s of recovery in the NO<sub>3</sub><sup>-</sup> trial (treatment effect, P=0.161;  
187 interaction effect, P=0.239). No significant differences due to NO<sub>3</sub><sup>-</sup> ingestion were observed, regardless of  
188 whether torque was expressed relative to body mass (treatment effect, P=0.326; interaction effect,  
189 P=0.281) or as a percentage of the non-fatigued baseline (treatment effect, P=0.275; interaction effect,  
190 P=0.500) (Fig. 2). There were also no differences in the predicted minimum or maximum torque or time  
191 course of recovery of torque determined via exponential curve fitting (Table 3).

192 **DISCUSSION**

193 Aging results in more rapid fatigue during, and slower recovery from, dynamic exercise. Older women in  
194 particular are prone to these negative effects of aging, which increases their risk of falls. The purpose of

195 the present study was to determine whether acute dietary  $\text{NO}_3^-$  intake might ameliorate these age-related  
196 changes in muscle function. However, despite producing large changes in plasma  $\text{NO}_3^-$  and  $\text{NO}_2^-$  levels,  
197 and hence presumably in NO bioavailability, we found no effect of such supplementation on either the  
198 fatigability or recoverability of muscle in this population.

199 In the present study, the ingestion of BRJ containing  $15.6 \pm 3.6$  mmol of  $\text{NO}_3^-$  increased the plasma  
200 concentration  $21 \pm 8$ -fold, or to an individual peak of  $783 \pm 139$   $\mu\text{mol/L}$  above baseline. Assuming essentially  
201 complete absorption, this corresponds to a volume of distribution of  $20.1 \pm 3.3$  L, which agrees exactly with  
202 our recent novel pharmacokinetic modeling study of the combined  $\text{NO}_3^-/\text{NO}_2^-$  system [Coggan et al.  
203 2020b]. Plasma  $\text{NO}_2^-$  concentrations also rose, albeit to a lesser extent, i.e.,  $4 \pm 4$ -fold, due to the larger  
204 volume of distribution and almost 70-fold more rapid clearance of the latter and the fact that only 3% of  
205 ingested  $\text{NO}_3^-$  is converted to  $\text{NO}_2^-$  [Coggan et al. 2020b]. These changes in plasma  $\text{NO}_3^-$  and  $\text{NO}_2^-$  are  
206 consistent with numerous previous studies of dietary  $\text{NO}_3^-$  supplementation that have employed a similar  
207 dose [e.g., Jonvik et al. 2018]. We did not measure breath NO levels as we have in our previous studies of  
208  $\text{NO}_3^-$  supplementation in older individuals [Coggan et al. 2020a; Gallardo et al., 2021], but based on such  
209 data the latter likely would have increased by at least 100%. It therefore seems reasonable to conclude  
210 that the ingestion of  $\text{NO}_3^-$ -containing BRJ was effective in increasing whole-body NO bioavailability.

211 Despite the above, acute  $\text{NO}_3^-$  supplementation has no impact on muscle fatigability during a  
212 50 contraction ( $\sim 60$  s) isokinetic knee extensor exercise test. The present results corroborate and extend  
213 our prior study of a smaller group of older women and men combined [Coggan et al. 2020a]. Although  
214 direct comparisons are challenging due to potential differences between small muscle mass and whole-  
215 body exercise, they are also consistent with those of prior studies examining the effects of  $\text{NO}_3^-$  ingestion  
216 on, e.g., 30 s Wingate test performance in younger, healthier individuals [Rimer et al. 2016; Jonvik et al.  
217 2018]. Indeed, a recent meta-analysis by Silva et al. [2022] concluded that dietary  $\text{NO}_3^-$  is effective at  
218 improving performance during dynamic exercise lasting 2-10 min, but not during shorter or longer efforts.

219 In contrast, Kadach et al. [2023] recently found that  $\text{NO}_3^-$  supplementation increased muscle torque  
220 throughout the first 90 s of a 300 s bout of repeated maximal isometric knee extensions (3 s contraction,  
221 2 s rest). Notably, however, numerous other investigations have failed to demonstrate any effect of  
222 dietary  $\text{NO}_3^-$  on maximal isometric torque [Esen et al. 2022], making the study by Kadach et al. [2023] an  
223 exception. Regardless, based on the present as well as our previous results, it seems clear that although  
224 acute ingestion of  $\text{NO}_3^-$  enhances maximal muscle speed and hence power in older individuals [Coggan et  
225 al. 2020a; Gallardo et al. 2021], it does not alter fatigability during intense contractile activity in older  
226 persons.

227 A novel aspect of the present investigation was determination of the effects of dietary  $\text{NO}_3^-$  on  
228 recovery of muscle contractile function following fatiguing exercise. Specifically, we hypothesized that  
229  $\text{NO}_3^-$  supplementation might enhance recovery of muscle torque by magnifying post-exercise hyperemia.  
230 Reductions in intramuscular  $\text{pO}_2$  and/or pH during exercise should accelerate conversion of  $\text{NO}_3^-/\text{NO}_2^-$  to  
231 NO [Lundberg and Weitzberg 2009], which in turn could lead to greater vasodilation and higher blood  
232 flow following exercise, once intramuscular pressure decreases. If so, this could result in more rapid  
233 restoration of muscle pH and/or high energy phosphate levels, and hence muscle function. Indeed,  $\text{NO}_3^-$   
234 intake has been previously reported to increase PCr recovery kinetics in healthy young men and women  
235 studied in hypoxia [Vanhatalo et al. 2011, 2014], but not in younger [Vanhatalo et al. 2014] or older [Kelly  
236 et al. 2013] individuals studied in normoxia. Although we did not measure changes in muscle pH and/or  
237 high energy phosphate levels in the older women in the present study, acute  $\text{NO}_3^-$  ingestion had no effect  
238 on the recovery of muscle torque following fatiguing exercise. Thus, either any increase in post-exercise  
239 blood flow was insufficient to result in more rapid restoration of function, or increased flow simply did  
240 not improve recovery, reflecting the likely multifactorial nature of fatigue under the present conditions  
241 [Kent-Braun et al., 2012].

242           There are a number of strengths to the present study, including a relatively large sample size,  
243 careful screening of participants to avoid confounding the effects of aging with those due to chronic  
244 disease, and the rigorous evaluation of muscle fatigability/recoverability during/after high intensity  
245 dynamic exercise. There are, however, a number of limitations as well. Specifically, as indicated above we  
246 did not collect any mechanistic measurements (e.g., changes in blood flow, PCr kinetics, etc.) that could  
247 have provided further insight into the effects of acute  $\text{NO}_3^-$  intake on skeletal muscle physiology in this  
248 population, even if function was unchanged. It is also possible that we might have obtained different  
249 results had we utilized a different dose of  $\text{NO}_3^-$ , had studied the participants after multiple days of  
250 supplementation, and/or had studied men instead of women. Since the effects of aging on muscle  
251 fatigability are most evident at higher speeds of movement [], we might also have observed an effect of  
252 dietary  $\text{NO}_3^-$  on fatigability had we tested at a higher velocity of knee extension. Similarly, it is possible  
253 that  $\text{NO}_3^-$  supplementation might enhance recovery from fatigue induced by other types and/or  
254 durations/intensities of exercise.

## 255 **CONCLUSION**

256           In summary, we have assessed the effects of acute  $\text{NO}_3^-$  intake on maximal isokinetic knee  
257 extensor torque during and after high intensity dynamic exercise in older women. Despite resulting in  
258 significant elevations in plasma  $\text{NO}_3^-$  and  $\text{NO}_2^-$  levels, and hence presumably in NO levels,  $\text{NO}_3^-$   
259 supplementation had no effect on muscle fatigability or recoverability under these conditions.

260

261 **REFERENCES**

- 262 Callahan, D.M., J.A. Kent-Braun. 2011. Effect of old age on human skeletal muscle force-velocity and  
263 fatigue properties. *J. Appl. Physiol.* 111:1345-1352.
- 264 Casey, D.P., S.M. Ranadive, M.J. Joyner. 2015. Aging is associated with altered vasodilator kinetics in  
265 dynamically contracting muscle: role of nitric oxide. *J. Appl. Physiol.* 119;232-241.
- 266 Christie, A., E.M. Snook, J.A. Kent-Braun. 2012. Systematic review and meta-analysis of skeletal muscle  
267 fatigue in old age. *Med. Sci. Sports Exerc.* 43:568-577.
- 268 Coggan, A.R., A.M. Abduljalil, S.C. Swanson, M.S. Earle, J.W. Farris, L.A. Mendenhall, P.-M. Robitaille. 1993.  
269 Muscle metabolism during exercise in young and older untrained and endurance-trained men. *J. Appl.*  
270 *Physiol.* 75:2125-2133.
- 271 Coggan, A.R., M.N. Baranauskas, R.L. Hinrichs, Z. Liu, S.J. Carter. 2022. Effect of dietary nitrate on human  
272 muscle power: a systematic review and individual subject data meta-analysis. *J. Int. Soc. Sports Nutr.*  
273 18:66.
- 274 Coggan, A.R., S.R. Broadstreet, K. Mahmood, D. Mikhalkova, M. Madigan, I. Bole, J.L. Leibowitz, et al.  
275 2018a. Dietary nitrate increases  $VO_2$  peak and performance but does not alter ventilation or efficiency in  
276 patients with heart failure with reduced ejection fraction. *J. Card. Fail.* 24:65-73.

- 277 Coggan, A.R., S.R. Broadstreet, D. Mikhalkova, I. Bole, J.L. Leibowitz, A. Kadkhodayan, S. Park, et al. 2018b.  
278 Dietary nitrate-induced increases in human muscle power: high versus low responders. *Physiol. Rep.*  
279 6:e13575.
- 280 Coggan, A.R., R.L. Hoffman, D.A. Gray, R.N. Moorthi, D.P. Thomas, J.L. Leibowitz, D. Thies D, et al. 2020a.  
281 A single dose dietary of nitrate increases maximal muscle speed and power in healthy older men and  
282 women. *J. Gerontol. A Biol. Sci. Med. Sci.* 75:1154-1160.
- 283 Coggan, A.R., J.L. Leibowitz, A. Kadkhodayan, D.T. Thomas, S. Ramamurthy, C. Anderson Spearie, S. Waller,  
284 et al. 2015. Effect of acute dietary nitrate intake on knee extensor speed and power in healthy men and  
285 women. *Nitric Oxide* 48:16-21.
- 286 Coggan, A.R., S.B. Racette, D. Thies, L.R. Peterson, R.E. Stratford Jr. 2020b. Simultaneous pharmacokinetic  
287 analysis of nitrate and its reduced metabolite, nitrite, following ingestion of inorganic nitrate in a mixed  
288 patient population. *Pharm. Res.* 37,235.
- 289 Dalton, B.H., G.A. Power, A.A. Vandervoort, C.L. Rice. 2010. Power loss is greater in old men than young  
290 men during fast plantar flexion contractions. *J. Appl. Physiol.* 109:1441-1447.
- 291 Esen, O., N. Dobbin, M.J. Callaghan. 2022. The effect of dietary nitrate on the contractile properties of  
292 human skeletal muscle: A systematic review and meta-analysis. May 23;1-12. doi:  
293 10.1080/07315724.2022.2037475. Online ahead of print.

294 Ferri, E, E. Marzetti, R. Calvani, A. Picca, M. Cesari, B. Arosio. 2020. Role of age-related mitochondrial  
295 dysfunction in sarcopenia. 21:5236.

296 Freedman, V.A., D.A. Wolf, B.C. Spillman BC. 2016. Disability-free life expectancy over 30 years: A growing  
297 female disadvantage in the US population. Am. J. Public Health. 106:1079-1085.

298 Gallardo, E.J., D.A. Gray, R.L. Hoffman, B.A. Yates, R.N. Moorthi, A.R. Coggan. 2021. Dose-response effect  
299 of dietary nitrate on muscle contractility and blood pressure in older subjects: a pilot study. J. Gerontol. A  
300 Biol. Sci. Med. Sci. 76:591-598.

301 Jansson, E., G.A. Dudley, B. Norman, and P.A. Tesch. Relationship of recovery from intense exercise to  
302 the oxidative potential of skeletal muscle. Acta Physiol. Scand. 139:147-152.

303 Jonvik, K.L., J. Nyakayiru, J.W. van Dijk, K. Masse, S.B. Ballak, J.M.G. Senden, L.J.C. van Loon, L.B. Verdijk.  
304 2018. Repeated-sprint performance and plasma responses following beetroot juice supplementation do  
305 not differ between recreational, competitive, and elite sprint athletes. Eur. J. Sport Sci. 7:1-10.

306 Kadach, S., J.W. Park, Z. Stoyanov, M.I. Black, A. Vanhatalo, M. Burnley, P.J. Walter, et al. 2023. <sup>15</sup>N-labeled  
307 dietary nitrate supplementation increases human skeletal muscle nitrate concentration and improves  
308 muscle torque production. Acta Physiol. (Oxf.) Jan6:e13924. Online ahead of print.

309 Kelly, J., J. Fulford, A. Vanhatalo, J.R. Blackwell, O. French, S.J. Bailey, M. Gilchrist, et al. 2013. Effects of  
310 short-term dietary nitrate supplementation on blood pressure, O<sub>2</sub> uptake kinetics, and muscle and  
311 cognitive function in older adults. Am. J. Physiol. 304:R73-R83.



- 312 Kemp, G.J., C.H. Thompson, D.J. Taylor, G.K. Radda. 1997. Proton efflux in human skeletal muscle during  
313 recovery from exercise. *Eur. J. Appl. Physiol.* 76:462-471.
- 314 Kent-Braun, J.A., R.H. Fitts, A. Christie. 2012. Skeletal muscle fatigue. *Compr. Physiol.* 2:997-1044.
- 315 Larsson, L., H. Degens, M. Li, L. Salviati, Y. il Lee, W. Thompson, J.L. Kirkland, M. Sandri. 2019. Sarcopenia:  
316 Aging-related loss of muscle mass and function. *Physiol. Rev.* 99: 427–511.
- 317 Layec, G., L.J. Haseler, J.D. Trinity, C.R. Hart, X. Liu, Y. Le Fur, E.-K. Jeong, R.S. Richardson. 2013.  
318 Mitochondrial function and increased convective O<sub>2</sub> transport: implications for the assessment of  
319 mitochondrial respiration in vivo. *J. Appl. Physiol.* 115:803-811.
- 320 Lewsey, S.C., K. Weiss, M. Schär, Y. Zhang, P.A. Bottomley, T.J. Samuel, Q.-L. Xue, et al. 2020. Exercise  
321 intolerance and rapid skeletal muscle energetic decline in human age-associated frailty. *JCI Insight* Oct  
322 15;5(20):e141246.
- 323 Lundberg, J.O., E. Weitzberg. 2009. NO generation from inorganic nitrate and nitrite: Role in physiology,  
324 nutrition, and therapeutics. *Arch. Pharm. Res.* 32:1119-1126.
- 325 Murtagh, K.N., H.B. Hubert. 2004. Gender differences in physical disability among an elderly cohort. *Am.*  
326 *J. Public Health.* 94:1406-1411.

- 327 Ridout, S.J., B.A. Parker, S.L. Smithmyer, J.U. Gonzales, K.C. Beck, D.N. Proctor. 2010. Age and sex influence  
328 the balance between maximal cardiac output and peripheral vascular reserve. *J. Appl. Physiol.* 108:483-  
329 489.
- 330 Rimer, E. G., L. R. Peterson, A. R. Coggan, and J. C. Martin. 2016. Acute dietary nitrate supplementation  
331 increases maximal cycling power in athletes. *Int. J. Sports Physiol. Perform.* 11:715–720.
- 332 Schwendner, K.I., A.E. Mikesky, W.S. Holt Jr, M. Peacock, D.B. Burr. 1997. Differences in muscle endurance  
333 and recovery between fallers and nonfallers, and between young and older women. *J. Geront.* 52:MI55-  
334 M160.
- 335 Silva, K.V.C., B.D. Costa, A.C. Gomes, B. Saunders, J.F. Mota. 2022. Factors that moderate the effect of  
336 nitrate ingestion on exercise performance in adults: A systematic review with meta-analyses and meta-  
337 regressions. *Adv. Nutr.* 13:1866-1881.
- 338 Stamler, J.S., G. Meissner. 2001. Physiology of nitric oxide in skeletal muscle. *Physiol. Rev.* 81:209-237.
- 339 Vanhatalo, A., A.M. Jones, J.R. Blackwell, P.G. Winyard, J. Fulford. 2014. Dietary nitrate accelerates  
340 postexercise muscle metabolic recovery and O<sub>2</sub> delivery in hypoxia. *J. Appl. Physiol.* 117:1460-1470.
- 341 Vanhatalo, A., J. Fulford, S.J. Bailey, J.R. Blackwell, P.G. Winyard, A.M. Jones. 2011. Dietary nitrate reduces  
342 muscle metabolic perturbation and improves exercise tolerance in hypoxia. *J. Physiol.* 589:5517-5528.

343 Webb, D.J., S. Freestone, M.J. Allen, G.J. Muirhead. 1999. Sildenafil citrate and blood-pressure–lowering  
344 drugs: results of drug interaction studies with an organic nitrate and a calcium antagonist. *Am. J. Cardiol.*  
345 83:21C-28C.

346 Yoon, T., B. Schlinder-Delap, M.L. Keller, S.K. Hunter. 2012. Supraspinal fatigue impedes recovery from a  
347 low-intensity sustained contraction in old adults. *J. Appl. Physiol.* 112:849-858.

348

349 **FUNDING**

350 This work was supported by the Office of the Vice Provost for Research at Indiana University Purdue  
351 University Indianapolis and by the National Institutes of Health (grant numbers R21 AG053606 to ARC,  
352 K23 DK102824 to RNM, P30 AR072581 to Sharon Moe, and UL1 TR002529 to Anantha Shekhar). The  
353 contents of this article are solely the responsibility of the authors and do not necessarily represent the  
354 official view of the National Institutes of Health.

355 **DISCLOSURE STATEMENT**

356 The authors have nothing to disclose.

Table 1. Effects of NO<sub>3</sub><sup>-</sup> supplementation on plasma NO<sub>3</sub><sup>-</sup> and NO<sub>2</sub><sup>-</sup> concentrations.

|                                                    |         | Time of measurement |                         |                          |                          |
|----------------------------------------------------|---------|---------------------|-------------------------|--------------------------|--------------------------|
|                                                    |         | Pre                 | 1 h post                | 2 h post                 | 10 min post              |
| <u>Trial</u>                                       |         | <u>ingestion</u>    | <u>ingestion</u>        | <u>ingestion</u>         | <u>exercise</u>          |
| Plasma [NO <sub>3</sub> <sup>-</sup> ]<br>(μmol/L) | Placebo | 47.7<br>±30.3       | 47.7<br>±23.5           | 51.9<br>±25.9            | 51.1<br>±24.4            |
|                                                    | Nitrate | 42.6<br>±17.7       | 622.9<br>±227.6         | 751.3<br>±156.9          | 735.2<br>±158.2          |
|                                                    | P value | 0.312               | 1.20 x 10 <sup>-7</sup> | 3.35 x 10 <sup>-10</sup> | 5.60 x 10 <sup>-10</sup> |
| Plasma [NO <sub>2</sub> <sup>-</sup> ]<br>(μmol/L) | Placebo | 0.343<br>±0.230     | 0.363<br>±0.286         | 0.387<br>±0.358          | 0.411<br>±0.330          |
|                                                    | Nitrate | 0.376<br>±0.286     | 0.786<br>±0.783         | 0.968<br>±0.803          | 1.209<br>±0.883          |
|                                                    | P value | 0.404               | 2.28 x 10 <sup>-2</sup> | 4.50 x 10 <sup>-3</sup>  | 2.45 x 10 <sup>-3</sup>  |

Values are mean±S.D. for n=18.

Table 2. Fatigue test summary results.

| <u>Trial</u> | <u>Average Torque (Nm/kg)</u> | <u>Total work (J/kg)</u> | <u>Work first 1/3<sup>rd</sup> (J/kg)</u> | <u>Work last 1/3<sup>rd</sup> (J/kg)</u> | <u>Fatigue index (%)</u> |
|--------------|-------------------------------|--------------------------|-------------------------------------------|------------------------------------------|--------------------------|
| Placebo      | 0.57<br>±0.10                 | 34.6<br>±8.0             | 15.7<br>±8.0                              | 8.0<br>±2.1                              | 50.8<br>±4.8             |
| Nitrate      | 0.57<br>±0.10                 | 35.3<br>±8.2             | 16.0<br>±3.7                              | 8.2<br>±2.1                              | 51.4<br>±5.8             |
| P value      | 0.969                         | 0.260                    | 0.204                                     | 0.229                                    | 0.593                    |

Values are mean±S.D. for n=18.

Table 3. Curve fit parameters for recovery of isokinetic torque at 3.14 rad/s.

| <u>Trial</u> | Minimum torque<br><u>(% of non-fatigued)</u> | Maximum torque<br><u>(% of non-fatigued)</u> | Time constant<br><u>(s<sup>-1</sup>)</u> | Half-life<br><u>(s)</u> | S.E.E.<br><u>(%)</u> |
|--------------|----------------------------------------------|----------------------------------------------|------------------------------------------|-------------------------|----------------------|
| Placebo      | 45.6                                         | 97.8                                         | 0.01515                                  | 72.4                    | 4.3                  |
|              | ±7.9                                         | ±8.0                                         | ±0.00898                                 | ±82.0                   | ±1.2                 |
| Nitrate      | 45.8                                         | 97.4                                         | 0.01457                                  | 58.1                    | 4.7                  |
|              | ±6.2                                         | ±5.5                                         | ±0.00671                                 | ±26.7                   | ±1.6                 |
| P value      | 0.882                                        | 0.856                                        | 0.785                                    | 0.506                   | 0.336                |

Values are mean±S.D. for n=18.



## FIGURE LEGENDS

Figure 1. Knee extensor peak torque during the fatigue test. Note that although 5 repetition averages are presented for clarity, statistical analysis was performed using the peak torque from each of the 50 repetitions. Values are mean±S.D. for n=18. No significant differences were observed.

Figure 2. Recovery of knee extensor peak torque following the fatigue test. Data are expressed either relative to body mass (*top panel*) or as a percentage of the maximum non-fatigued value (*bottom panel*). Values are mean±S.D. for n=18. No significant differences were observed.

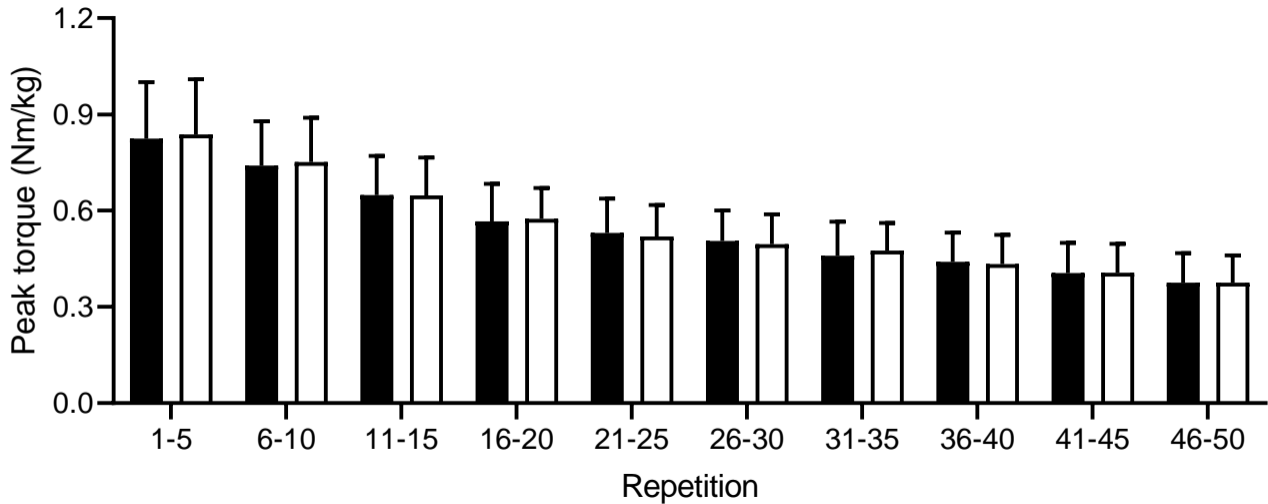

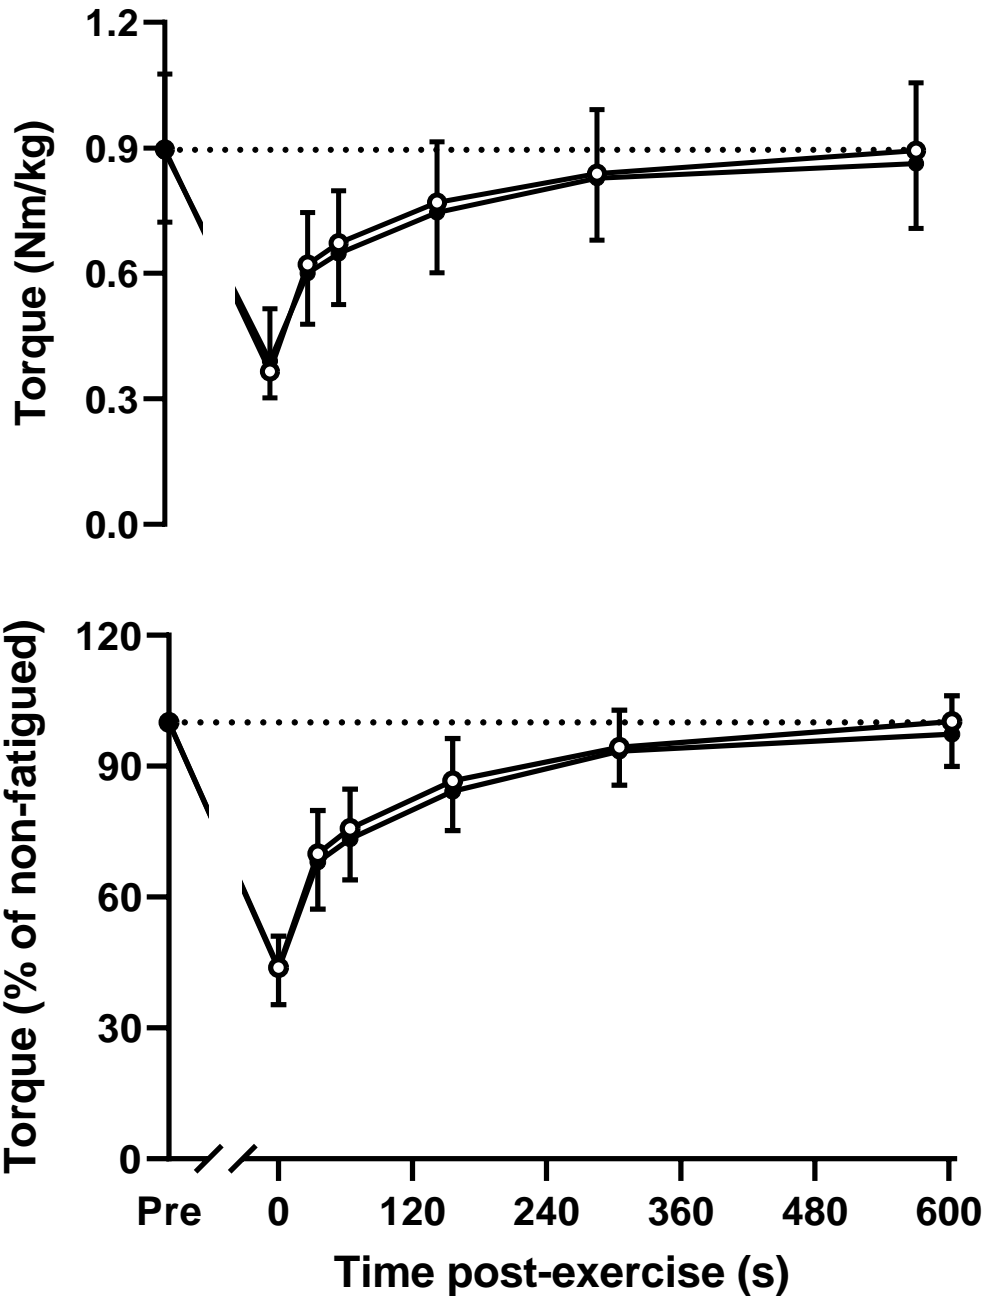

Source: https://medrxiv.org/content/10.1101/2023.02.15.23285957v1.full.pdf
